# Supplementary material
Source: PubMed Central journal article supplement (PMC6071922)
Supplement: MD-008-C7MD00210F-s001.pdf [file MD-008-C7MD00210F-s001.pdf]

# **18 $\alpha$ -glycyrrhetic Acid Monoglucuronide as Anti-inflammatory Agent through Suppression of NF- $\kappa$ B and MAPK Signaling Pathway**

Bo Li,<sup>a</sup> Yongan Yang,<sup>b</sup> Liuzeng Chen,<sup>a</sup> Shichao Chen,<sup>a</sup> Jing Zhang,<sup>\*c</sup> and Wenjian Tang<sup>\*a</sup>

<sup>a</sup> School of Pharmacy, Anhui Medical University, Hefei 230032, China. E-mail: ahmupharm@126.com; Fax & Tel: (+86) 551-65161115.

<sup>b</sup> Elion Nature Biological Technology Co., Ltd, Nanjing 210038, China.

<sup>c</sup> Anhui Prevention and Treatment Center for Occupational Disease, Anhui No. 2 Province People's Hospital, Hefei 230022, China.

## **Content**

|                                                                              |               |
|------------------------------------------------------------------------------|---------------|
| <b>1. Synthesis Procedures of Glycyrrhizin Analogs</b>                       | <b>S1–S4</b>  |
| <b>2. Biological Assays and Experimental Procedures</b>                      | <b>S5–S7</b>  |
| 2.1. Cell Culture                                                            |               |
| 2.2. Assay for NO Production                                                 |               |
| 2.3. Cell Cytotoxicity                                                       |               |
| 2.4. Measurement of IL-6                                                     |               |
| 2.5. Western Blot Analysis                                                   |               |
| 2.6. Immunofluorescence Analysis                                             |               |
| 2.7. 18 $\alpha$ -GAMG Alleviated CCl <sub>4</sub> -induced Hepatic Fibrosis |               |
| <b>Copies of NMR spectra of compounds 3a – 3u</b>                            | <b>S8–S13</b> |

## 1. Synthesis Procedures of Glycyrrhizin Analogs

**18 $\beta$ -GA** was provided by Jiangsu Nature Biological Engineering Technology Co., Ltd., Jiangsu, P. R. China. *Aspergillus* sp Ts-1, a kind of  $\beta$ -glucuronidase, selectively hydrolyzed the terminal-glucuronyl linkage of **18 $\beta$ -GA** to produce **18 $\beta$ -GAMG** in 54% yield. **18 $\alpha$ -GA** and **18 $\alpha$ -GAMG** were respectively synthesized in yields of 23% and 21% after recrystallization from **18 $\beta$ -GA** and **18 $\beta$ -GAMG** by alkaline isomerization. **18 $\alpha$ -GCCS** and **18 $\beta$ -GCCS** were respectively prepared in yields of 75% and 72% from **18 $\alpha$ -GA** and **18 $\beta$ -GA** by acid hydrolysis (Scheme 1). The structures of Glycyrrhizin analogs were elucidated by mass spectra,  $^1\text{H-NMR}$  and  $^{13}\text{C-NMR}$  spectra.

**18 $\beta$ -GA**: White powder; m.p.: 234–236 °C;  $[\alpha]_{20}^{\text{D}} = +52$  ( $c = 1.0$ , MeOH);  $^{13}\text{C-NMR}$  (75 MHz, DMSO- $d_6$ ): Table S1. TOF-HRMS:  $m/z$   $[\text{M} + \text{Na}]^+$  calcd for  $\text{C}_{42}\text{H}_{62}\text{NaO}_{16}$ : 845.3930; found: 845.3935.

**18 $\beta$ -GAMG**: This compound was prepared from **18 $\beta$ -GA** *via* biotransformation reaction. *Aspergillus* sp. Ts-1 on glucose yeast agar slant was inoculated into a 250 mL Erlenmeyer flask containing 100 mL of seed medium consisting of 1.0 g glucose, 0.2 g yeast, 1.0 g agar, 0.1 g  $\text{KH}_2\text{PO}_4$  and 0.025g  $\text{MgSO}_4$  in distilled water (pH 7.0). The culture media were sterilized at 121 °C for 20 min and the fermentation was carried out at 30 °C on a rotary shaker at 200 rpm. After 24 h of inoculation, 30 mL sterilized medium was inoculated into a 1,000 mL Erlenmeyer flask containing 300 mL pre-culture sample consisting of 15 g GA, 0.30 g  $\text{KH}_2\text{PO}_4$ , 3.0 g urea and 0.24 g  $\text{MgSO}_4$  in distilled water and the pH value was adjusted to 6.0. The culture media were sterilized at 121 °C for 20 min and the fermentation was carried out at 30 °C on a rotary shaker at 250 rpm.

After 72 h of inoculation, the culture solution was filtered and the filtrate was extracted with ethyl acetate. The extract was concentrated under the reduced pressure. The residue (14.5 g) was applied to a silica gel column (800 g, 5.0  $\times$  100 cm) and eluted with  $\text{CHCl}_3$ –MeOH in a gradient manner from 100:1 to 1:1. By TLC analysis, fractions I–IX was obtained. Fractions VI–VIII was concentrated *in vacuo* and recrystallization from aqueous MeOH to give **18 $\beta$ -GAMG** (6.35 g, 54% yield) as a white crystalline powder. M.p.: 237–239 °C;  $[\alpha]_{20}^{\text{D}} = +91$  ( $c = 1.0$ , MeOH);  $^1\text{H-NMR}$  (500 MHz,

DMSO-*d*<sub>6</sub>)  $\delta$  (ppm): 0.76 (s, 3H, 24-CH<sub>3</sub>), 0.77 (s, 3H, 28-CH<sub>3</sub>), 0.99 (s, 3H, 23-CH<sub>3</sub>), 1.06 (s, 2  $\times$  3H, 25-CH<sub>3</sub>, 26-CH<sub>3</sub>), 1.10 (s, 3H, 29-CH<sub>3</sub>), 1.34 (s, 3H, 27-CH<sub>3</sub>), 2.34 (s, 1H, 9-H), 3.01 (m, 1H, 4'-H), 3.08 (dd, 1H,  $J_1 = 4.8$  Hz,  $J_2 = 11.2$  Hz, 3-H), 3.15 (t, 1H,  $J = 9.0$  Hz, 3'-H), 3.30 (m, 1H, overlapped, 2'-H), 3.58 (d, 1H,  $J = 9.7$  Hz, 5'-H), 4.25 (d, 1H,  $J = 7.8$  Hz, 1'-H), 5.40 (s, 1H, 12-H); <sup>13</sup>C-NMR (125 MHz, DMSO-*d*<sub>6</sub>): Table S1. TOF-HRMS:  $m/z$  [M + Na]<sup>+</sup> calcd for C<sub>36</sub>H<sub>54</sub>NaO<sub>10</sub>: 669.3609; found: 669.3608.

**General Procedure of Alkaline Isomerization of the 18 $\beta$ -isomer to the 18 $\alpha$ -isomer:** A solution of **18 $\beta$ -GA** (5.00 g, 6.1 mmol) in 5.0 M NaOH solution (100 mL) was heated and stirred for 12 h at 90 °C. After the reaction mixture was cooled to < 5 °C, the pH was adjusted to 2.5 with concentrated HCl. After 12 h, the mixture was filtrated, washed with water, dried. The product **18 $\alpha$ -GA** (1.17 g, 23% yield) was obtained as a white crystalline powder by crystallization from ethanol/EtOAc. M.p.: 211–216 °C;  $[\alpha]_{20}^D = +20$  ( $c = 1.0$ , MeOH); <sup>1</sup>H-NMR (300 MHz, DMSO-*d*<sub>6</sub>)  $\delta$  (ppm): 0.65 (s, 3H, 28-CH<sub>3</sub>), 0.73 (s, 3H, 24-CH<sub>3</sub>), 0.95 (s, 3H, 23-CH<sub>3</sub>), 1.04 (s, 3H, 26-CH<sub>3</sub>), 1.10 (s, 3H, 25-CH<sub>3</sub>), 1.16 (s, 3H, 29-CH<sub>3</sub>), 1.33 (s, 3H, 27-CH<sub>3</sub>), 4.31 (d, 1H,  $J = 7.3$  Hz, 1'-H), 4.49 (d, 1H,  $J = 7.6$  Hz, 1''-H), 5.33 (s, 1H, 12-H); <sup>13</sup>C-NMR (75 MHz, DMSO-*d*<sub>6</sub>): Table S1. TOF-HRMS:  $m/z$  [M + Na]<sup>+</sup> calcd for C<sub>42</sub>H<sub>62</sub>NaO<sub>16</sub>: 845.3930; found: 845.3938.

**18 $\alpha$ -GAMG:** According to the above procedure, **18 $\alpha$ -GAMG** (0.83 g, 21% yield) was obtained from **18 $\beta$ -GAMG** (4.00 g, 4.9 mmol) as a white crystalline powder. M.p.: 229–231 °C;  $[\alpha]_{20}^D = +24$  ( $c = 1.0$ , MeOH); <sup>1</sup>H-NMR (300 MHz, DMSO-*d*<sub>6</sub>)  $\delta$  (ppm): 0.65 (s, 3H, 28-CH<sub>3</sub>), 0.77 (s, 3H, 24-CH<sub>3</sub>), 0.92 (s, 3H, 23-CH<sub>3</sub>), 0.98 (s, 3H, 25-CH<sub>3</sub>), 1.04 (s, 3H, 26-CH<sub>3</sub>), 1.16 (s, 3H, 29-CH<sub>3</sub>), 1.33 (s, 3H, 27-CH<sub>3</sub>), 2.27 (overlapped, 9-H), 3.01 (t, 1H,  $J = 8.4$  Hz, 4'-H), 3.07 (dd, 1H,  $J_1 = 6.5$  Hz,  $J_2 = 9.7$  Hz, 3-H), 3.15 (t, 1H,  $J = 9.0$  Hz, 3'-H), 3.30 (t, 1H,  $J = 9.8$  Hz, 2'-H), 3.58 (d, 1H,  $J = 9.7$  Hz, 5'-H), 4.24 (d, 1H,  $J = 7.8$  Hz, 1'-H), 5.33 (s, 1H, 12-H); <sup>13</sup>C-NMR (75 MHz, DMSO-*d*<sub>6</sub>): Table S1. TOF-HRMS:  $m/z$  [M + Na]<sup>+</sup> calcd for C<sub>36</sub>H<sub>54</sub>NaO<sub>10</sub>: 669.3609; found: 669.3600.

**General Procedure of Acid Hydrolysis of Glycyrrhizin: 18 $\beta$ -GA** (2.00 g, 2.43 mmol) was added to a solution of AcOH (100 mL) and 5.0 M HCl (20 mL), the reaction mixture was heated and stirred for 1 h at 100 °C. After the reaction mixture was cooled to < 10 °C, the mixture was filtrated, washed with water, ethanol. The filter cake was dried to obtain the product **18 $\beta$ -GCCS** (0.82 g, 72% yield) as a white

crystalline powder. M.p.: > 250 °C, <sup>1</sup>H-NMR (300 MHz, DMSO-*d*<sub>6</sub>, ppm): δ = 0.65 (3 H, s, 28-CH<sub>3</sub>), 0.69 (3 H, s, 24-CH<sub>3</sub>), 0.90 (3 H, s, 23-CH<sub>3</sub>), 1.04 (3 H, s, 25-CH<sub>3</sub>), 1.09 (3 H, s, 26-CH<sub>3</sub>), 1.16 (3 H, s, 29-CH<sub>3</sub>), 1.33 (3 H, s, 27-CH<sub>3</sub>), 2.27 (1 H, m, 9-H), 3.01 (1 H, m, 3-H), 4.31 (1 H, d, *J* = 1.9, 3-OH), 5.33 (1 H, s, 12-H), 12.17 (1 H, s, COOH). <sup>13</sup>C-NMR (75 MHz, DMSO-*d*<sub>6</sub>, ppm): Table S1. HRMS (ESI-TOF) calcd for C<sub>30</sub>H<sub>46</sub>NaO<sub>4</sub> [M+Na]<sup>+</sup> 493.3288, found 493.3285.

**18α-GCCS:** According to the above procedure, **18α-GCCS** (0.86 g, 75% yield) was obtained from **18α-GA** (2.00 g, 2.43 mmol) as a white crystalline powder. M.p.: > 250 °C, <sup>1</sup>H-NMR (300 MHz, DMSO-*d*<sub>6</sub>, ppm): δ = 0.65 (3 H, s, 28-CH<sub>3</sub>), 0.69 (3 H, s, 24-CH<sub>3</sub>), 0.90 (3 H, s, 23-CH<sub>3</sub>), 1.04 (3 H, s, 25-CH<sub>3</sub>), 1.09 (3 H, s, 26-CH<sub>3</sub>), 1.16 (3 H, s, 29-CH<sub>3</sub>), 1.33 (3 H, s, 27-CH<sub>3</sub>), 2.27 (1 H, m, 9-H), 3.01 (1 H, m, 3-H), 4.31 (1 H, d, *J* = 1.9, 3-OH), 5.33 (1 H, s, 12-H), 12.17 (1 H, s, COOH). <sup>13</sup>C-NMR (75 MHz, DMSO-*d*<sub>6</sub>, ppm): Table S1. HRMS (ESI-TOF) calcd for C<sub>30</sub>H<sub>46</sub>NaO<sub>4</sub> [M+Na]<sup>+</sup> 493.3288, found 493.3280.

**Table S1.** <sup>13</sup>C-NMR data for **18α-GA**, **18α-GAMG**, **18α-GCCS**, **18β-GA**, **18β-GAMG** and **18β-GCCS** in DMSO-*d*<sub>6</sub> (δ, ppm, *J* in Hz)

| Position        | 18α-GA | 18α-GAMG | 18α-GCCS | 18β-GA            | 18β-GAMG          | 18β-GCCS |
|-----------------|--------|----------|----------|-------------------|-------------------|----------|
| 1               | 38.6   | 38.3     | 38.4     | 38.7              | 38.4              | 38.5     |
| 2               | 25.5   | 25.7     | 26.2     | 25.8              | 25.6              | 26.9     |
| 3               | 88.3   | 87.9     | 76.6     | 88.3              | 87.7              | 76.5     |
| 4               | 39.0   | 39.1     | 38.7     | 39.1 <sup>a</sup> | 39.1 <sup>a</sup> | 38.7     |
| 5               | 54.4   | 54.3     | 54.1     | 54.4              | 54.1              | 54.1     |
| 6               | 17.1   | 17.1     | 17.2     | 17.0              | 16.9              | 17.1     |
| 7               | 33.2   | 33.2     | 33.2     | 32.2              | 32.1              | 32.1     |
| 8               | 43.4   | 43.4     | 43.3     | 44.9              | 44.9              | 44.8     |
| 9               | 59.9   | 59.9     | 59.9     | 61.1              | 61.0              | 61.1     |
| 10              | 36.2   | 36.2     | 36.4     | 36.4              | 36.3              | 36.6     |
| 11              | 198.8  | 198.7    | 198.7    | 199.1             | 198.9             | 198.9    |
| 12 <sup>*</sup> | 123.1  | 123.1    | 123.0    | 127.4             | 127.3             | 127.3    |
| 13 <sup>*</sup> | 166.2  | 166.1    | 166.0    | 169.8             | 169.7             | 169.5    |
| 14              | 44.7   | 44.7     | 44.6     | 43.0              | 42.9              | 42.9     |
| 15              | 26.3   | 26.3     | 26.9     | 26.1              | 26.1              | 26.0     |
| 16 <sup>*</sup> | 36.8   | 36.7     | 36.6     | 25.9              | 25.8              | 25.8     |

|     |                   |                   |       |           |       |       |
|-----|-------------------|-------------------|-------|-----------|-------|-------|
| 17* | 35.4              | 35.3              | 35.1  | 31.6      | 31.5  | 31.5  |
| 18* | 39.6 <sup>a</sup> | 39.8 <sup>a</sup> | 40.1  | 48.1      | 48.0  | 48.0  |
| 19* | 31.5              | 31.4              | 31.4  | 40.7      | 40.6  | 39.1  |
| 20* | 41.7              | 41.6              | 41.6  | 43.2      | 43.1  | 43.0  |
| 21* | 28.5              | 28.4              | 28.3  | 30.4      | 30.4  | 30.3  |
| 22  | 35.2              | 35.1              | 35.2  | 37.6      | 37.5  | 37.5  |
| 23  | 27.3              | 27.5              | 28.2  | 27.2      | 27.4  | 27.8  |
| 24  | 16.2              | 16.45             | 16.1  | 16.0      | 16.2  | 15.9  |
| 25  | 16.4              | 16.49             | 16.4  | 16.3      | 16.4  | 16.1  |
| 26  | 18.2              | 18.2              | 18.2  | 18.4      | 18.3  | 18.3  |
| 27* | 20.4              | 20.4              | 20.4  | 23.0      | 23.0  | 23.0  |
| 28* | 15.7              | 15.7              | 15.6  | 28.5      | 28.4  | 28.3  |
| 29* | 20.7              | 20.6              | 20.6  | 27.9      | 27.8  | 28.1  |
| 30  | 179.7             | 179.5             | 179.4 | 177.8     | 177.6 | 177.6 |
| 1'  | 103.5             | 105.6             |       | 104.8     | 105.5 |       |
| 2'  | 81.0              | 75.6              |       | 82.7      | 76.1  |       |
| 3'  | 74.2              | 73.7              |       | 76.3      | 75.6  |       |
| 4'  | 72.0/71.9         | 71.6              |       | 71.6/71.3 | 71.5  |       |
| 5'  | 76.6              | 76.1              |       | 74.9      | 73.7  |       |
| 6'  | 172.4             | 170.6             |       | 172.4     | 170.5 |       |
| 1'' | 103.7             |                   |       | 103.5     |       |       |
| 2'' | 75.0              |                   |       | 75.7      |       |       |
| 3'' | 75.2              |                   |       | 75.9      |       |       |
| 4'' | 72.0/71.9         |                   |       | 71.6/71.3 |       |       |
| 5'' | 76.0              |                   |       | 75.2      |       |       |
| 6'' | 172.0             |                   |       | 172.0     |       |       |

---

\* Carbon atoms of chemical shifts with significant difference between the 18 $\beta$ -isomer and the 18 $\alpha$ -isomer. <sup>a</sup> Overlapped with solvent.

## **2. Biological Assays and Experimental Procedures**

### **2.1. Cell Culture**

RAW264.7 murine macrophages were cultured in DMEM containing 10% fetal bovine serum, 100 units/mL penicillin, and 100 µg/mL streptomycin at 37 °C in a 5% CO<sub>2</sub> humidified atmosphere.

### **2.2. Assay for NO Production**

RAW264.7 cells were inoculated at  $1 \times 10^5$  cells per well in 24-well plate and cultured for 20 h. The cells were then pre-treated with 50 µM compounds which were prepared in serum-free medium for 2 h before stimulation with LPS (1 µg/mL). After stimulated for 24 h by LPS. The NO production was determined by detecting the nitrite level using Griess reagent (Beyotime, China) according to the manufacturer's instructions. then measured absorbance of the samples at 540 nm (OD<sub>540</sub>) in a microplate reader (MQX200, Bio-Tek, USA). NO inhibition rate =  $[\text{control (OD}_{540})} - \text{compound (OD}_{540})] / [\text{control (OD}_{540})} - \text{blank (OD}_{540})] \times 100\%$ .

Control: treated with LPS only.

Compound: treated with LPS and compounds.

Blank: cultured with fresh medium only.

### **2.3. Cell Cytotoxicity**

Cell cytotoxicity was evaluated by methyl thiazolyl tetrazolium (MTT) assay. RAW264.7 cells were inoculated at  $6 \times 10^3$  cells per well in 96-well plate. After cultured for 24 h, the cells were treated with different compounds which were diluted in DMEM for 24 h. Then 20 µL of 0.5 mg/mL MTT reagent was added into the cells and incubated for 4 h. After 4 h, cell culture was removed and then 150 µL DMSO was added to dissolve the formazan. The optical density was measured at 570 nm (OD<sub>570</sub>). Cell viability was calculated from three independent experiments. The density of formazan formed in blank group was set as 100% of viability. Cell viability (%) =  $\text{compound (OD}_{570}) / \text{blank (OD}_{570})} \times 100\%$

Blank: cultured with fresh medium only.

Compound: treated with compounds or LPS.

**Table S1.** Effect of Glycyrrhizin analogs on the viability of RAW264.7 cells<sup>a</sup>

| Compound                          | Concentrations | Cell viability (%) <sup>a</sup> |
|-----------------------------------|----------------|---------------------------------|
| <b>Blank</b>                      |                | 100                             |
| <b>18<math>\beta</math>-GA</b>    | 40 $\mu$ M     | 103.6 $\pm$ 2.8                 |
| <b>18<math>\alpha</math>-GA</b>   | 40 $\mu$ M     | 101.7 $\pm$ 3.4                 |
| <b>18<math>\beta</math>-GAMG</b>  | 40 $\mu$ M     | 97.5 $\pm$ 2.6                  |
| <b>18<math>\alpha</math>-GAMG</b> | 40 $\mu$ M     | 98.1 $\pm$ 2.0                  |
| <b>18<math>\beta</math>-GCCS</b>  | 40 $\mu$ M     | 96.6 $\pm$ 2.7                  |
| <b>18<math>\alpha</math>-GCCS</b> | 40 $\mu$ M     | 101.3 $\pm$ 3.0                 |
| <b>LPS</b>                        | 1 $\mu$ g/mL   | 99.5 $\pm$ 4.5                  |

<sup>a</sup> The results were showed as means  $\pm$  SD of at least three independent experiments.

#### 2.4. Measurement of IL-6

RAW264.7 cells ( $7 \times 10^4$  cells/well) were cultured in 24-well plate. After cultured for 24 h, and pretreated with 10 and 40  $\mu$ M of compounds for 2 h, and then LPS was added. The production of IL-6 was stimulated by the addition of 1  $\mu$ g/mL LPS and incubated for 20 h. The levels of IL-6 in the supernatant were determined using the mouse ELISA kit (IL-6: R&D SYSTEMS, DY406-05) which is operated according to the manufacturer's instructions.

#### 2.5. Western Blot Analysis

RAW264.7 cells were seeded into a 6-well culture plate at a density of  $2 \times 10^6$  cells per well, and then cultured for 24 h. Then, the culture medium was replaced by fresh medium containing 10, 20 and 30  $\mu$ M compounds, and 1  $\mu$ g/mL LPS was added. After cultured for another 30 min or 20 h, the cells were harvested and lysed with IP buffer (Beyotime, P0013) supplemented with 1 mM phenylmethanesulfonyl fluoride (PMSF: Beyotime, ST506) and incubated on ice for 30 min. The cell lysates were centrifuged at  $14,000 \times g$  for 10 min at 4  $^{\circ}$ C to remove insoluble materials and the supernatant was collected. Total protein concentration was determined using a BCA protein assay kit (Thermo Scientific, 23227). Each protein sample was mixed with a quarter volume of 5X SDS-PAGE sample loading buffer (100 mmol/L Tris-HCl pH 6.8, 4% SDS, 5%  $\beta$ -mercaptoethanol, 20% glycerol, and 0.1% bromophenol blue) and

boiled for 10 min. Equal amounts of total cellular protein were loaded per well in 12.5% precast SDS-PAGE gels and then transferred to polyvinylidene difluoride membranes (Bio-Rad) for over 60 min at 300 mA. The membranes were blocked with 5% non-fat dry milk in TBS plus 0.1% Tween 20 (TBST) for 2 h at room temperature, washed 3 times in TBST for 5 min each, incubated with the primary antibody (anti-phosphorylation of SAPK/JNK, anti-SAPK/JNK, anti-phosphorylation of ERK1/2, anti-ERK1/2, anti-phosphorylation of p38, anti-p38, anti-phosphorylation of IκBa , anti-IκBa, antiphosphorylation of NF-κB p65, and anti-NF-κB p65) at 4 °C overnight (all the primary antibodies were purchased from Cell Signaling Technology and diluted at the ratio of 1:1000), washed 3 times in TBST for 5 min each, incubated with anti-rabbit or anti-mouse secondary antibody (1:5000 in TBST, Cell Signaling Technology) for 90 min, washed in TBST and exposed to ECL reagents.

## **2.6. Immunofluorescence Assay**

RAW264.7 cells ( $7 \times 10^4$  cells/well) were cultured in 24-well plate. After cultured for 24 h, and pretreated with 20 and 30  $\mu$ M of 18 $\alpha$ -GAMG for 2 h, and then treated with LPS (1  $\mu$ g/mL) for 3 h. The cells were washed twice with cold PBS, fixed with 4% formaldehyde for 15 min, and then permeabilized with 0.3% Triton X-100 in PBS for 10 min. After that, the cells were blocked for 0.5 h with 5% BSA. Cells were later incubated with primary antibody anti-NF-κB p65 antibody for overnight, followed by Alexa Fluor 488-labeled goat anti-rabbit IgG secondary antibody. After a wash step, stained with DAPI for 5 min and the images were acquired.

## **2.7. 18 $\alpha$ -GAMG Alleviated CCl<sub>4</sub>-induced Hepatic Fibrosis**

Healthy male C57BL6 mice were randomly divided into 4 groups: control group, model group, high-dose 18 $\alpha$ -GAMG group and low-dose 18 $\alpha$ -GAMG group, and each with 10. All mice except normal group were given 20% CCl<sub>4</sub> olive oil (2 mL/kg) by hypodermic injection, two times a week for 4 weeks. Control group was given 0.9% sodium chloride by hypodermic injection, two times a week for 4 weeks. 18 $\alpha$ -GAMG (200 mg/kg and 100 mg/kg) was given by intra-gastric administration to high-dose 18 $\alpha$ -GAMG group and low-dose 18 $\alpha$ -GAMG, two times a week for 4 weeks at beginning of third week. All mice were killed at 4th week. Pathological changes in hepatic tissue were observed by HE and Masson staining.



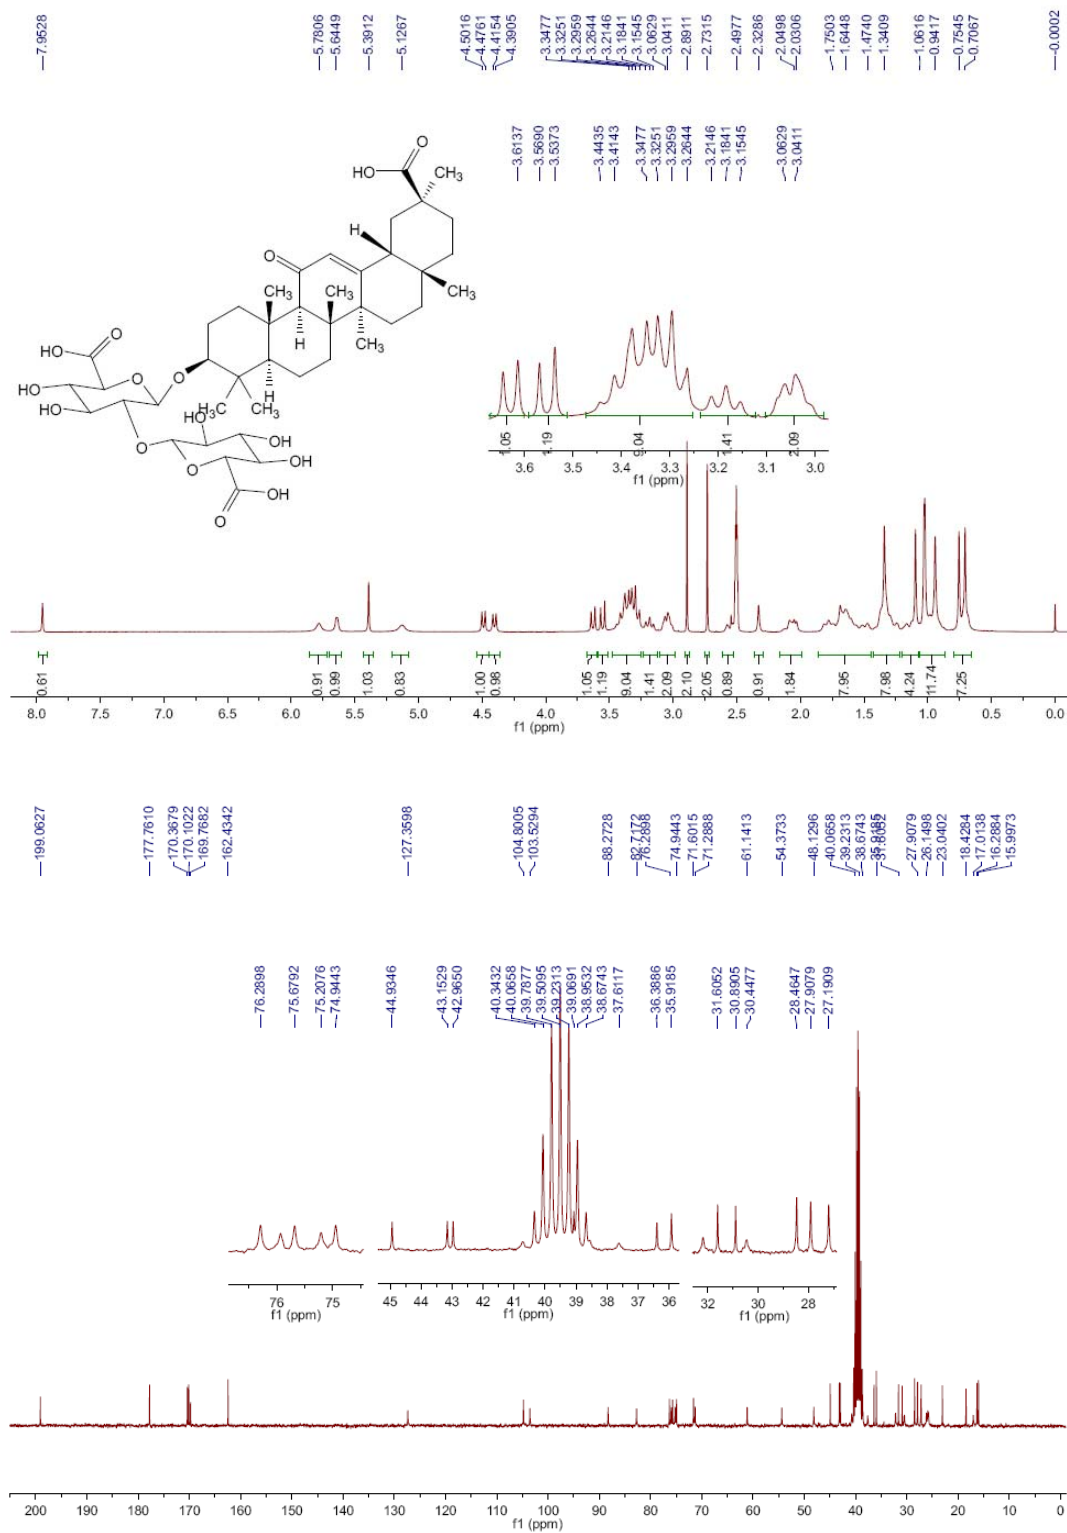

Figure S1. <sup>1</sup>H-NMR and <sup>13</sup>C-NMR spectra of 18β-GA.

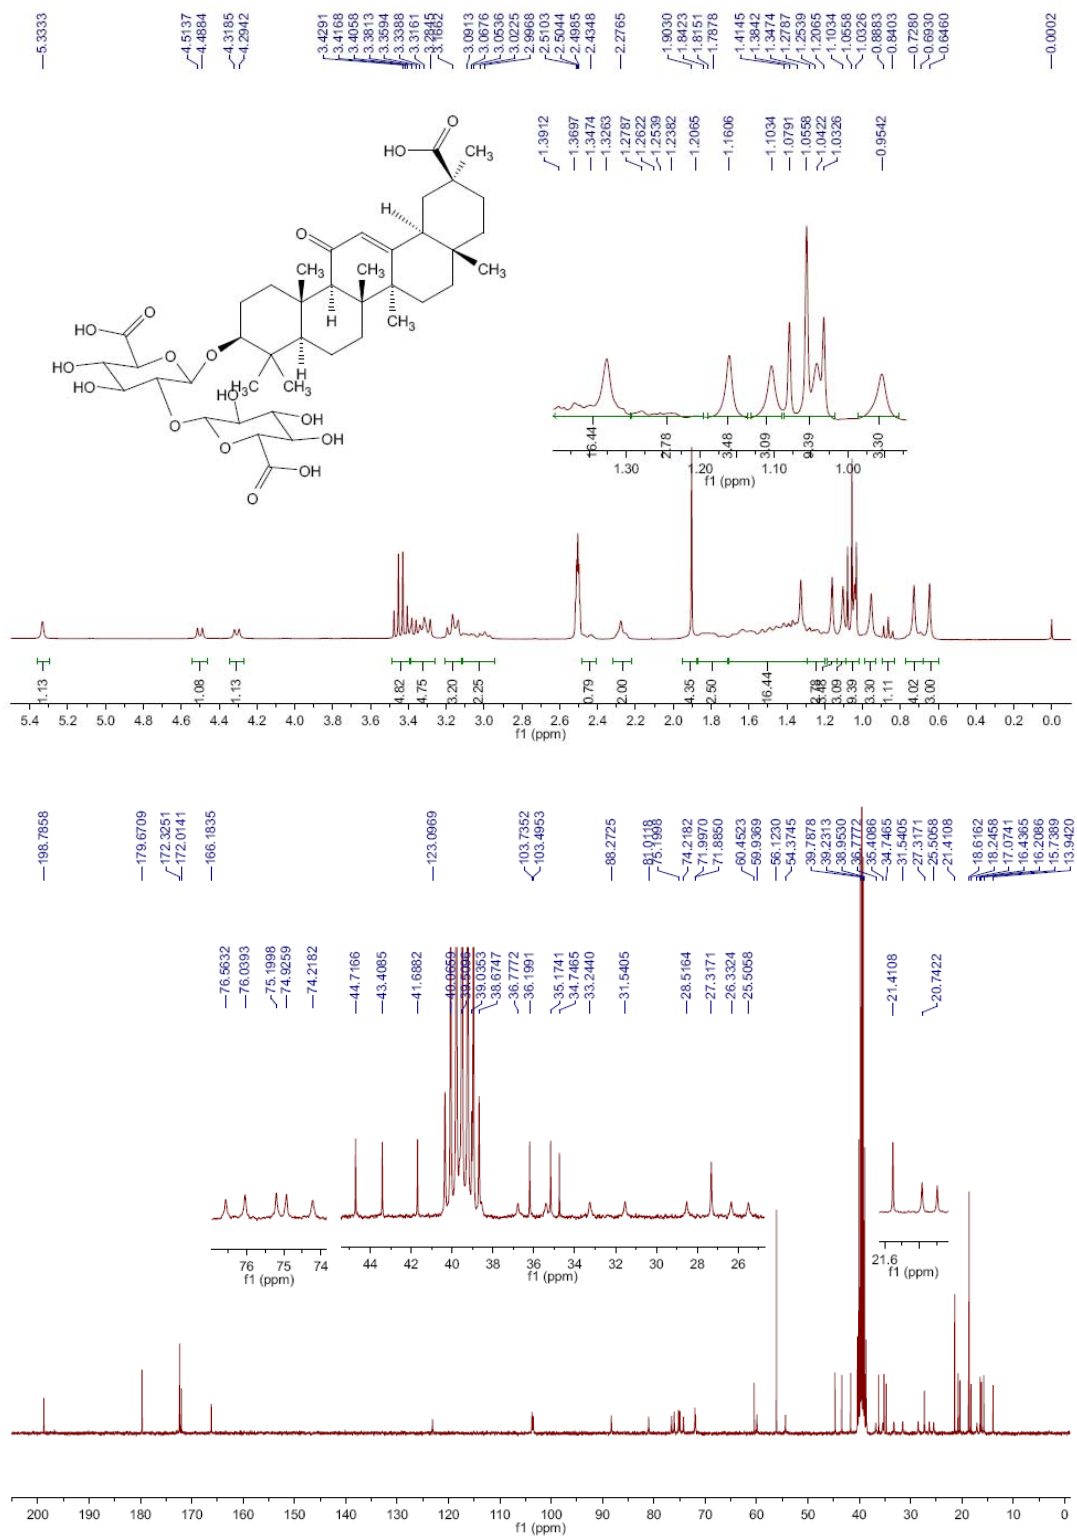

**Figure S2.** <sup>1</sup>H-NMR and <sup>13</sup>C-NMR spectra of **18 $\alpha$ -GA**.

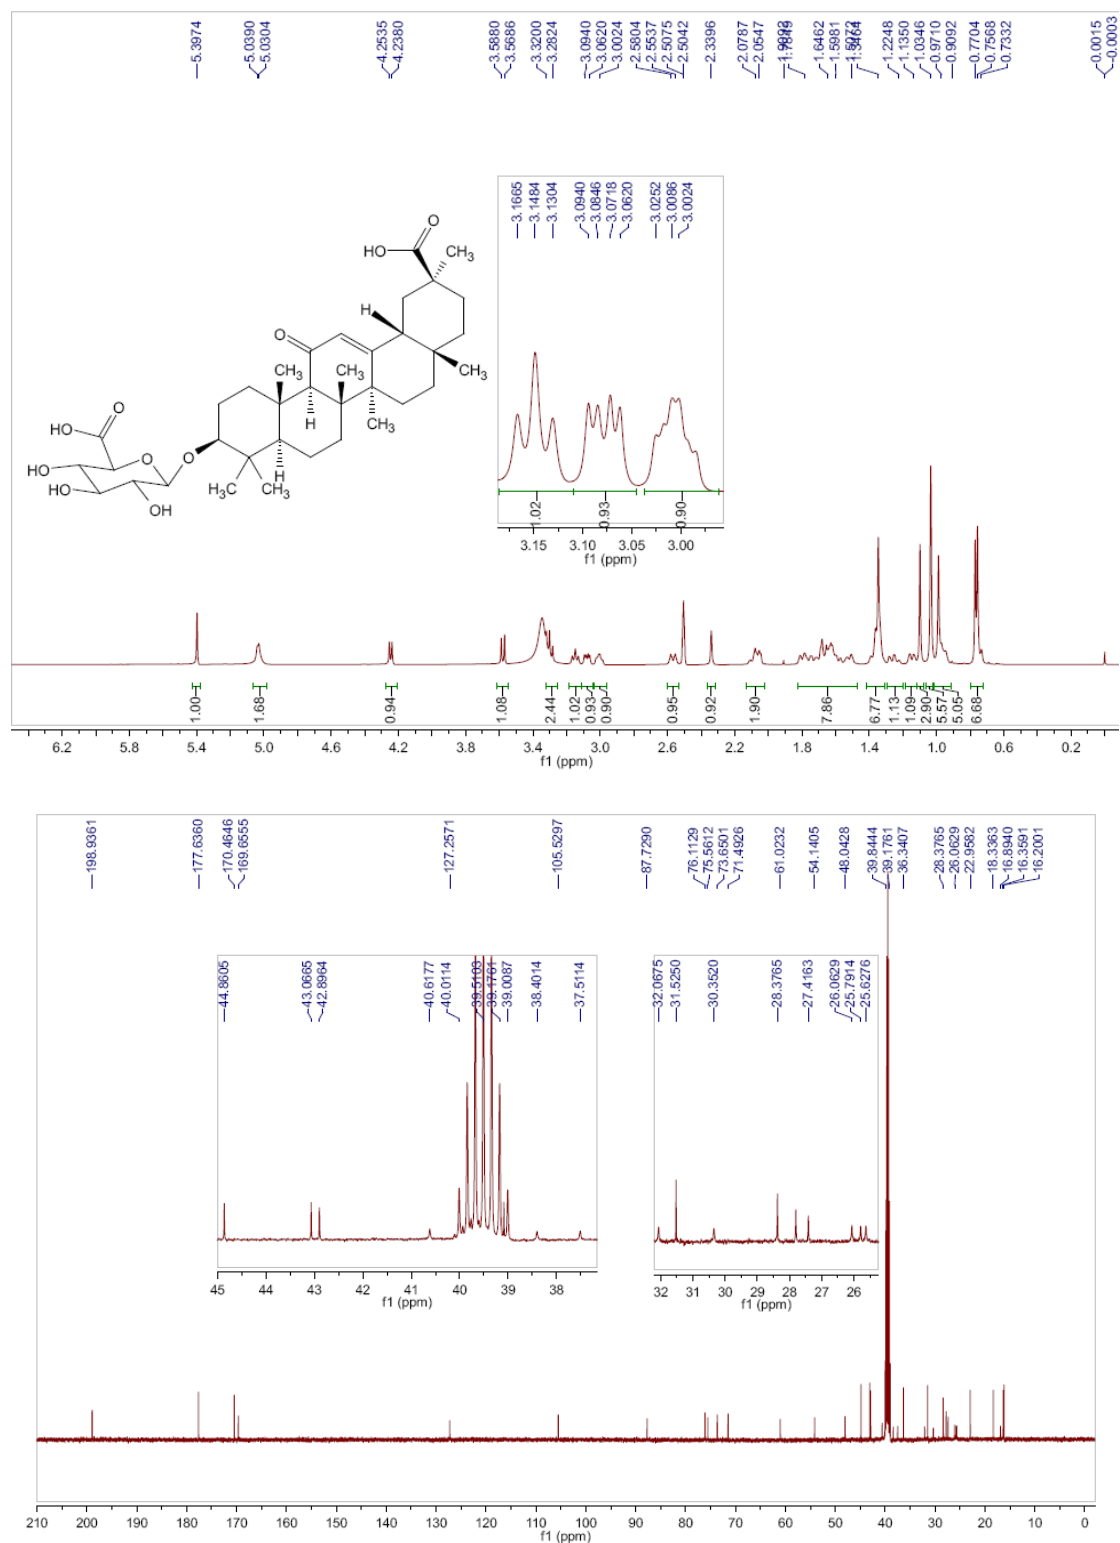

**Figure S3.** <sup>1</sup>H-NMR and <sup>13</sup>C-NMR spectra of 18β-GAMG.

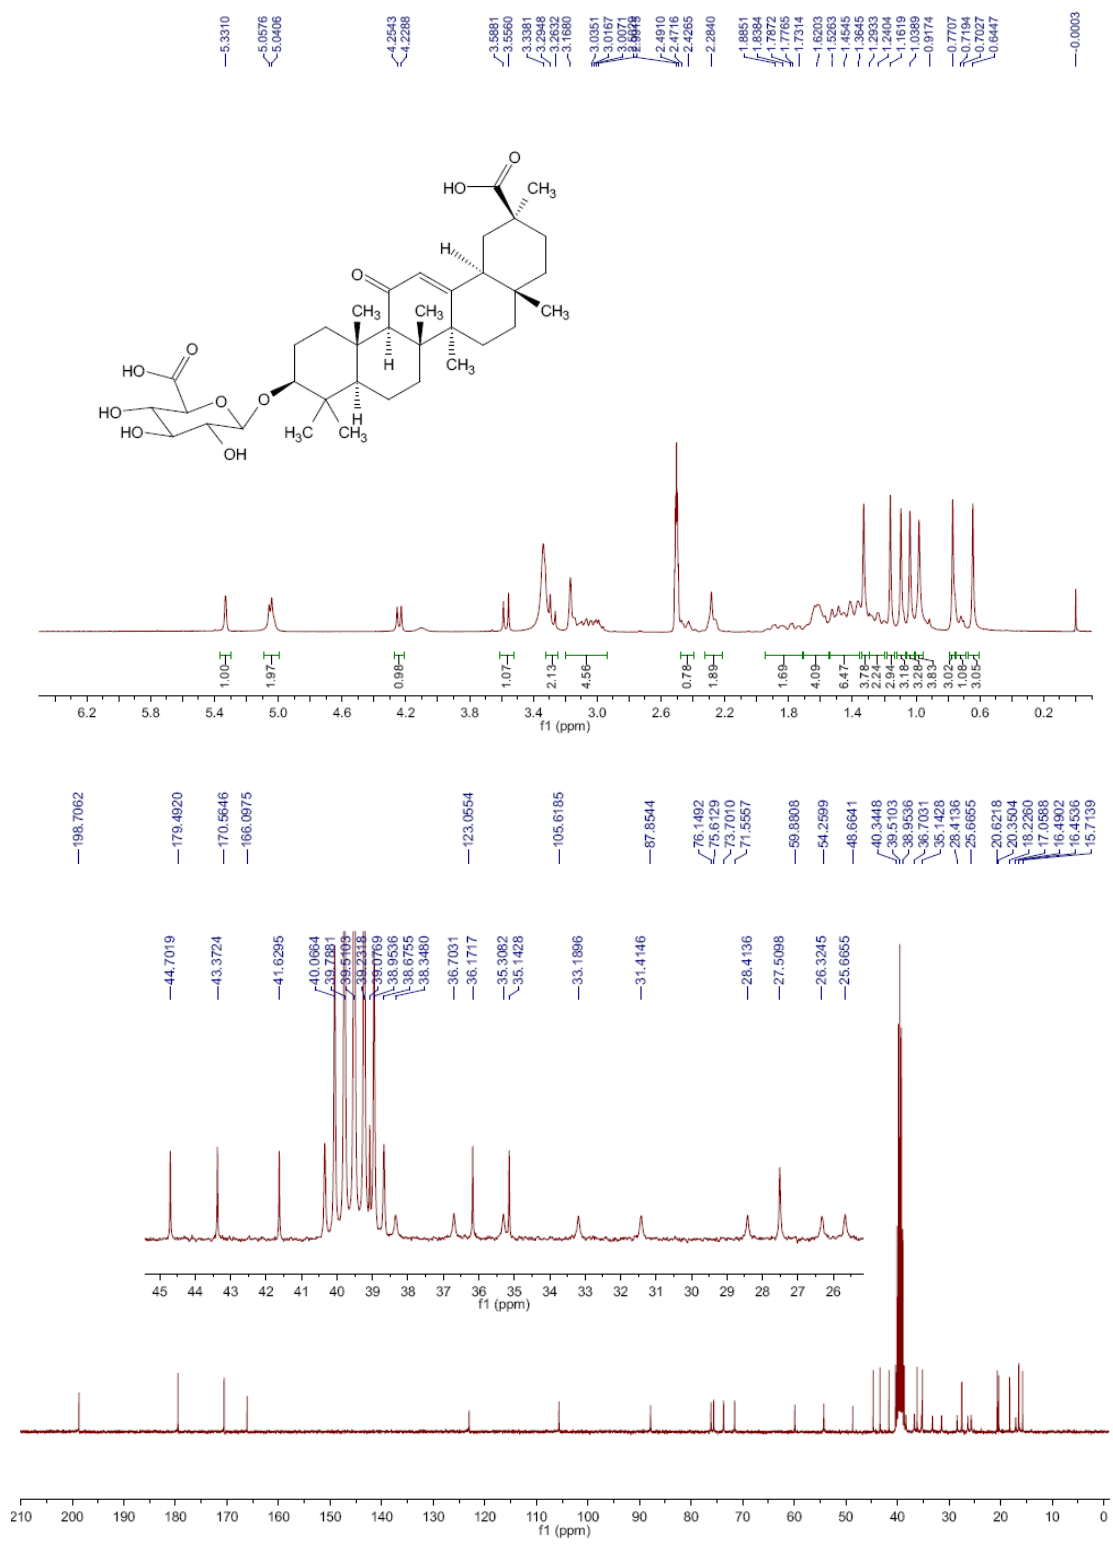

**Figure S4.** <sup>1</sup>H-NMR and <sup>13</sup>C-NMR spectra of **18α-GAMG**.

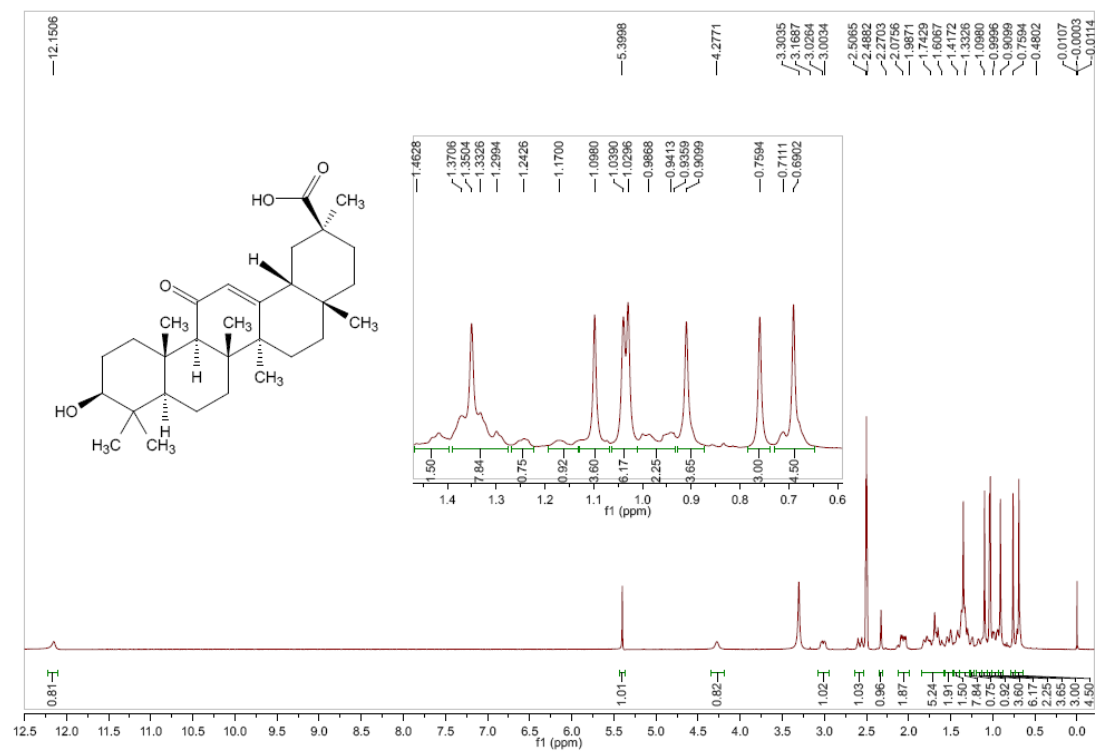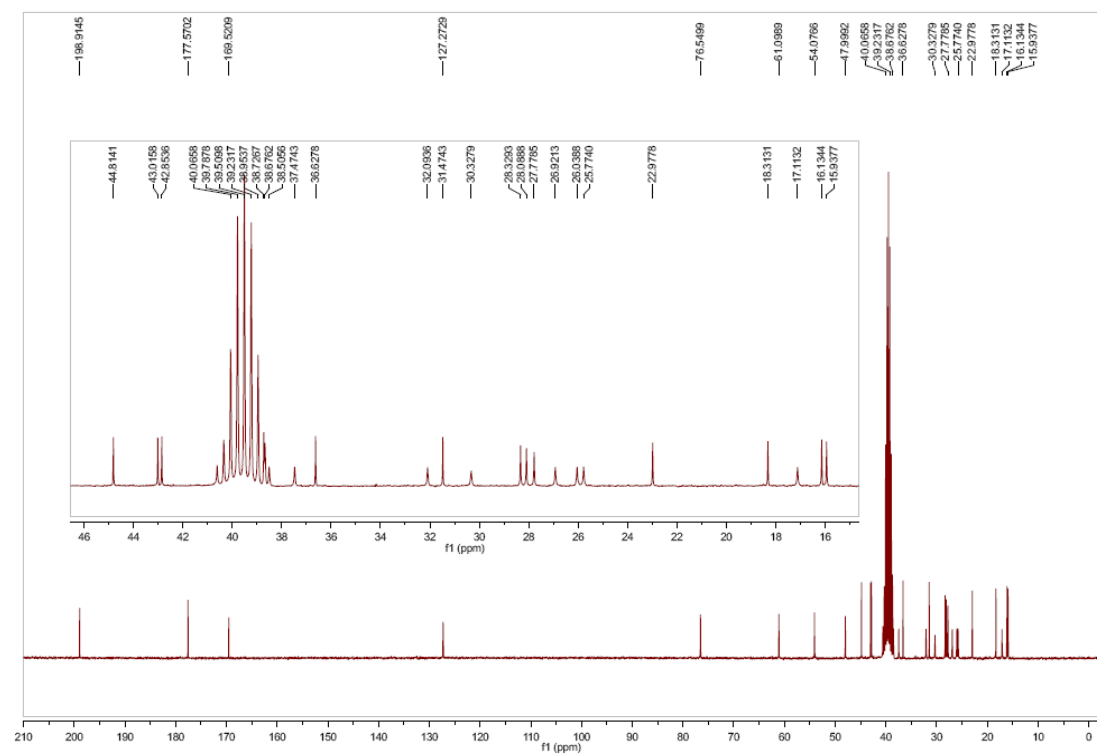

**Figure S5.** <sup>1</sup>H-NMR and <sup>13</sup>C-NMR spectra of 18β-GCCS.

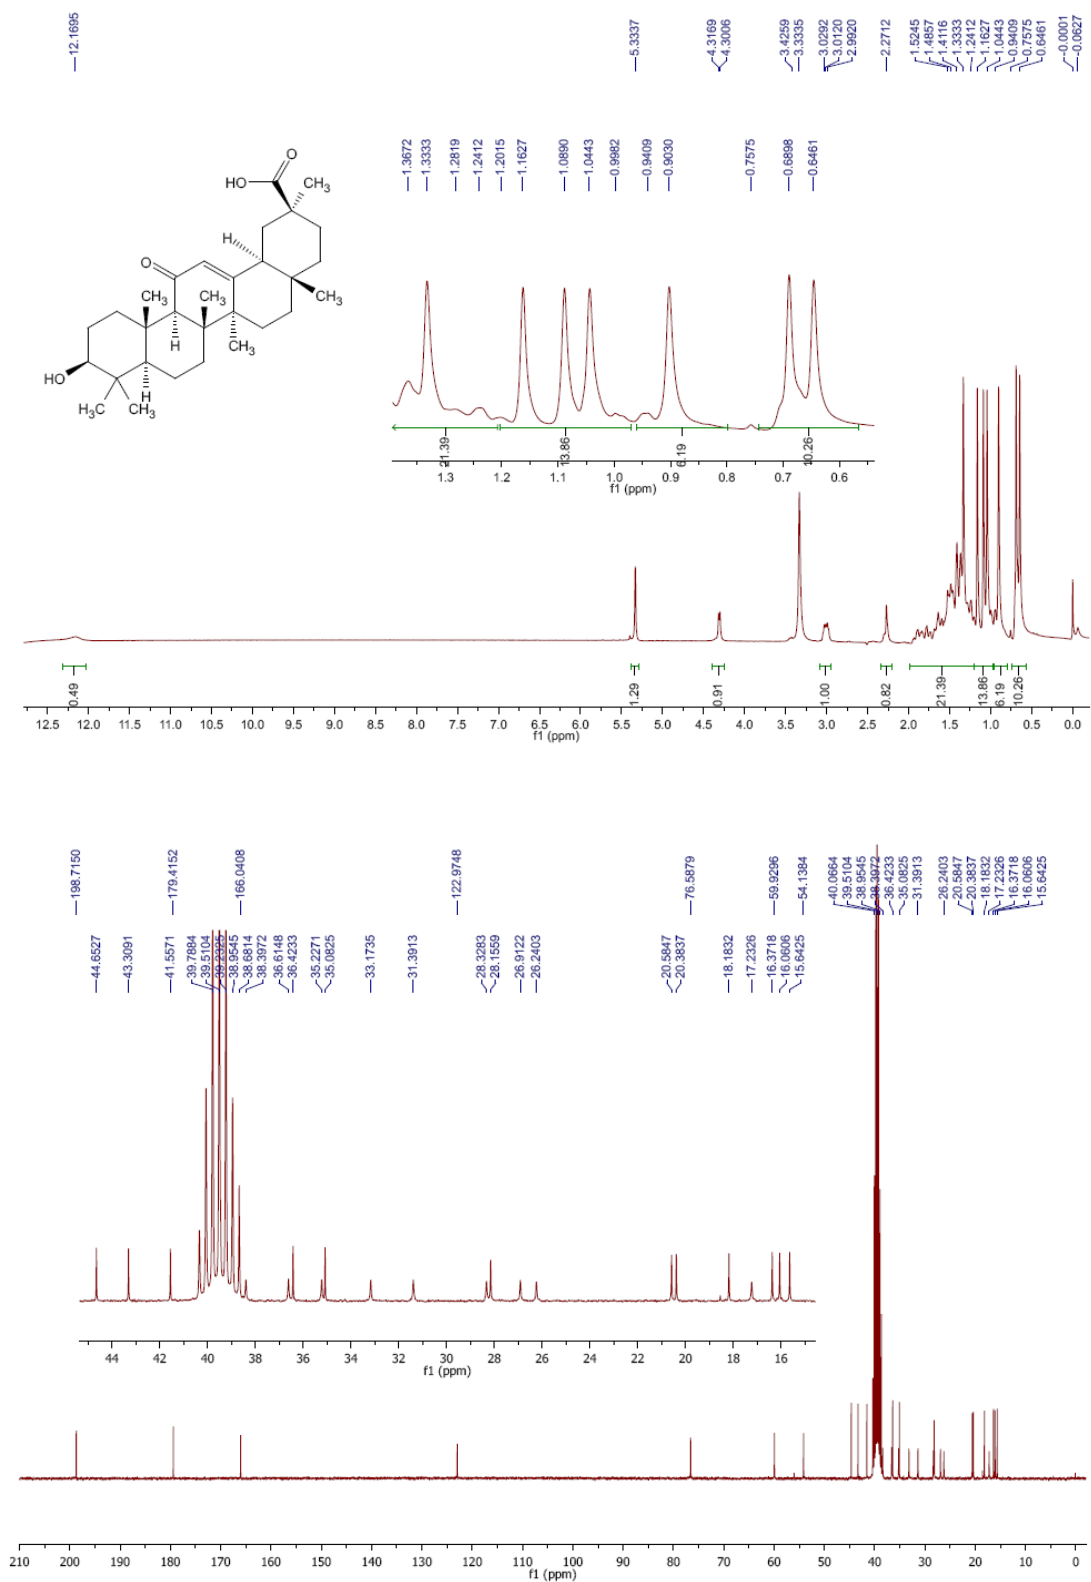

**Figure S6.** <sup>1</sup>H-NMR and <sup>13</sup>C-NMR spectra of **18α-GCCS**.
